1 Control becomes habitual early on when learning a novel motor  
2 skill

3 Christopher S. Yang<sup>1,2\*</sup>, Noah J. Cowan<sup>3,4</sup>, and Adrian M. Haith<sup>2</sup>

4 <sup>1</sup>Department of Neuroscience, Johns Hopkins University, Baltimore, MD, USA

5 <sup>2</sup>Department of Neurology, Johns Hopkins University, Baltimore, MD, USA

6 <sup>3</sup>Department of Mechanical Engineering, Johns Hopkins University, Baltimore, MD, USA

7 <sup>4</sup>Laboratory for Computational Sensing and Robotics, Johns Hopkins University,  
8 Baltimore, MD, USA

9 \*email: [christopher.yang@jhmi.edu](mailto:christopher.yang@jhmi.edu)

## 10 Abstract

11 When people perform the same task repeatedly, their behavior becomes habitual, or inflexible to changes  
12 in the goals or structure of a task. While habits have been hypothesized to be a key aspect of motor skill  
13 acquisition, there has been little empirical work investigating the relationship between skills and habits. To  
14 better understand this relationship, we examined whether and when people’s behavior would become habitual  
15 as they learned a challenging new motor skill. After up to ten days of practice, we altered the structure of the  
16 task to assess whether participants would flexibly adjust their behavior or habitually persist in performing  
17 the task the way they originally learned. We found that participants’ behavior became habitual early in  
18 practice—after only two days—at which point they were still relatively unskilled. These data demonstrate  
19 that motor skills become habitual after relatively little training, but can nevertheless further improve with  
20 practice.

## 21 Introduction

22 We have all experienced the frustration of having to overcome old habits when we need to alter the way we  
23 perform a task. In a recent striking example of this, YouTuber Destin Sandlin created a “backwards bicycle”,  
24 a bicycle where rotation of the handlebar in one direction causes the front tire to rotate in the opposite  
25 direction (i.e., opposite of a normal bicycle) [1]. Although it is easy to understand how the handlebar  
26 moves the tire and it is trivial to rotate the handlebar, people find it difficult to ride the backwards bicycle,  
27 seemingly because they habitually try to balance themselves using the same movements they would perform  
28 on a normal bicycle.

29 In neuroscience and psychology, habits are generally defined as behaviors which, through extensive repe-  
30 tition, have become inflexible to changes in the goals or structure of a task [2–4]. Habit formation has almost  
31 exclusively been studied in the context of *discrete* choices [5–10], such as deciding which button to press on  
32 a keypad, or whether or not to perform an action at all [7, 11]. In such cases, habits are conceptualized as  
33 stimulus–response associations that have become obligatory through repetition [12–15].

34 Perhaps surprisingly, habit formation has hardly been studied in the context of *continuous* motor skills like  
35 riding a bicycle. In this case, the analog of a stimulus–response association guiding behavior is a *controller*,  
36 a mapping from the instantaneous states of the environment and one’s body to outgoing motor commands.  
37 Under this framework, behavior can be considered to be habitual if one’s controller for a task becomes  
38 habitual. That is, if the mapping between states and motor commands becomes inflexible to change and one  
39 persists in using this controller even if it no longer successfully achieves control objectives. Although it is

40 conceptually straightforward to extend the concept of a habit from discrete tasks to continuous movement  
41 control, it is by no means clear that habits form in the same way in both cases. A key tenet of the stimulus–  
42 response framework is that a particular stimulus and resulting response must be paired repeatedly for a  
43 habit to form, but in continuous control tasks there are a continuum of (i.e., infinitely many) possible states  
44 and actions and it is unclear whether one will ever repeat the same action in the same state often enough  
45 for a habit to form.

46 Nevertheless, habits have been hypothesized to be a key aspect of motor skill acquisition, enabling  
47 more rapid behavioral responses and freeing up cognitive resources [16–20]. However, the exact relationship  
48 between habits and skill remains unclear [21], and progress in our understanding of this relationship is  
49 hampered by a dearth of empirical evidence examining how quickly behavior becomes habitual when learning  
50 a new motor skill. To a limited extent, behavior which could be interpreted as habits has been studied in  
51 continuous control tasks such as reaching under mirror-reversed visual feedback [22, 23] or more real-world  
52 skills like javelin throwing [24], swimming [25], and weightlifting [26]. However, such work has examined  
53 the process of replacing already highly skilled movements (baseline or well-practiced behavior) with new  
54 movements rather than how habits form when people *initially* learn a skill.

55 We performed an experiment to examine the process of habit formation in the context of learning a new  
56 continuous motor skill. Participants learned to control an on-screen cursor using a non-intuitive bimanual  
57 mapping where vertical movements of the left hand were mapped to horizontal movements of the cursor  
58 while horizontal movements of the right hand were mapped to vertical movements of the cursor. Previous  
59 work suggests that people learn this mapping by building a new controller *de novo* [27]—in contrast to how  
60 people learn simpler perturbations like rotations of visual feedback by adapting an *existing* controller [28–31].  
61 Three separate groups of participants learned to control the bimanual mapping over two, five, or ten days of  
62 practice. At the end of the final day of practice, we flipped the direction of the mapping between movement  
63 of the left hand and movement of the cursor (i.e., a mirror reversal) and assessed whether participants would  
64 habitually continue to control the cursor according to the originally practiced mapping, or whether they  
65 would be able to flexibly adjust their control to accommodate the new flipped mapping.

66 Previous studies of habit formation have suggested that the expression of habits may be masked by  
67 deliberative, goal-directed processes that might override habitual responses during the reaction time prior to  
68 movement, particularly if participants are allowed ample time to prepare their movements [32]. To account  
69 for habitual control potentially being masked in this way, we assessed habitual behavior using two different  
70 approaches with differing reaction time constraints. In the first task, participants made point-to-point reaches  
71 towards targets in random locations, and they were allowed unlimited time to deliberate about each reach.  
72 In the second task, participants tracked a target moving in an unpredictable, sum-of-sinusoids trajectory.

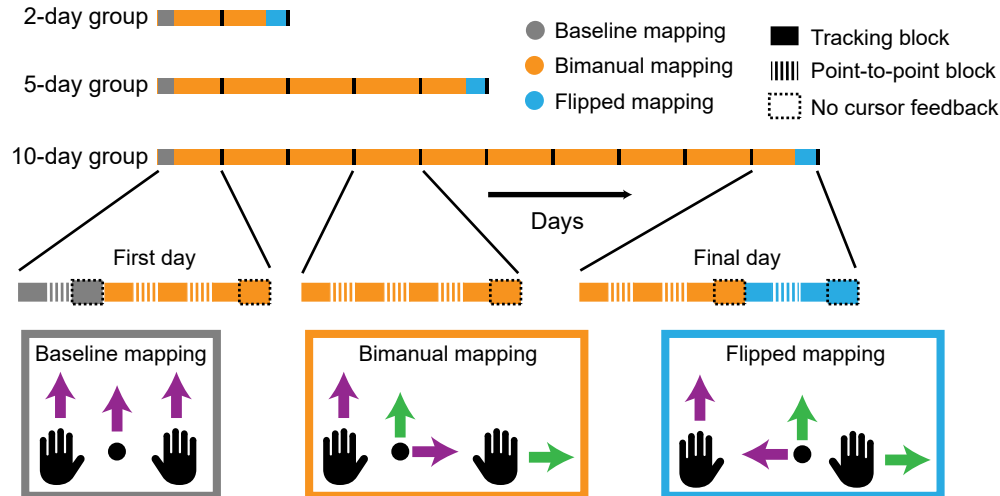

**Fig 1. Tasks and experiment.** Participants learned to control an on-screen cursor using a bimanual hand-to-cursor mapping (orange) over two ( $n = 13$ ), five ( $n = 14$ ), or ten ( $n = 5$ ) days of practice. Half of the participants in each group practiced the depicted bimanual mapping while the other half practiced an alternate version where cursor movements were rotated  $180^\circ$  relative to the depicted mapping (this was done to counterbalance any effects of biomechanics). On each day, participants performed blocks of point-to-point reaching (hashed rectangle; 1 block = 100 trials) and continuous tracking (1 block = 5 minutes) both with (solid rectangle) and without (solid rectangle with dashed outline) visual feedback of the cursor. Learning was compared relative to a baseline mapping where the cursor was placed at the average position of the two hands (gray). At the end of each group’s final training day, we flipped the left hand’s mapping to cursor movements (blue) and assessed whether participants would habitually continue to control the cursor under the bimanual mapping they originally learned.

73 Here, the amount of time participants had to prepare their movements varied with the frequency of the  
 74 target’s movement, with movements at high frequencies requiring particularly rapid responses and therefore  
 75 minimal scope for deliberation.

76 Using these tasks, we sought to examine whether or not habits would be observable under the flipped  
 77 mapping and, if so, when in the course of learning they would emerge.

## 78 Results

### 79 Participants became more skilled in the point-to-point task with practice over 80 multiple days

81 Three different groups of participants learned to control an on-screen cursor using a novel bimanual hand-  
 82 to-cursor mapping over two ( $n = 13$ ), five ( $n = 14$ ), or ten ( $n = 5$ ) days of practice (two different versions of  
 83 the bimanual mapping were used for different subsets of participants to control for potential biasing effects  
 84 of biomechanics; see “Tasks” section of Methods). Participants practiced this mapping by performing a series  
 85 of 12 cm point-to-point reaches towards targets, following a random walk within a  $20 \times 20$  cm workspace.

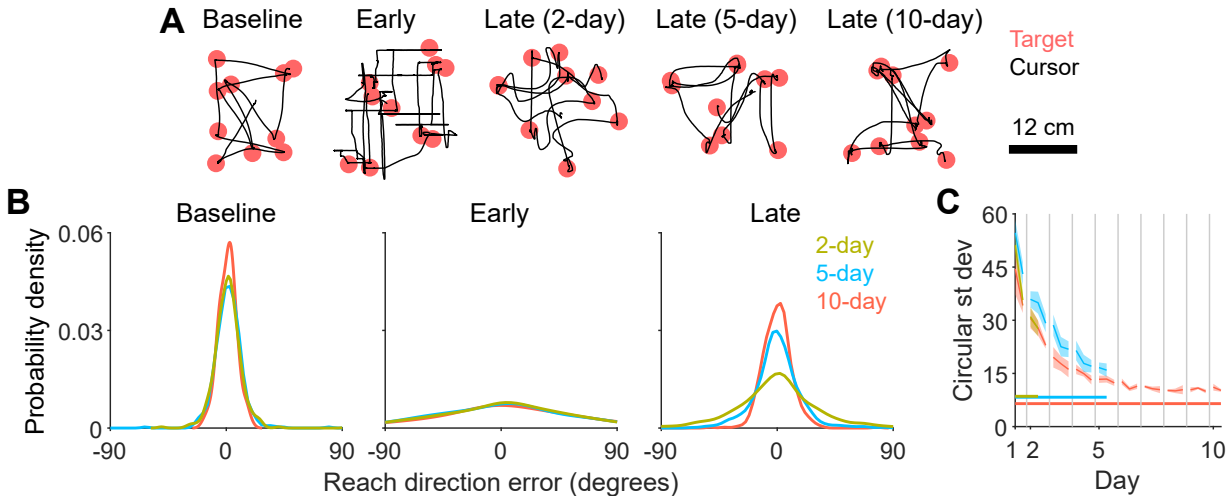

**Fig 2. Performance in the point-to-point task under the bimanual mapping.** A: Examples of raw cursor trajectories (black line) from baseline, early learning, and late learning (last block before flip block). Targets are displayed as red circles. Data from ten trials are shown for each block. B: Kernel-smoothed probability density of reach direction errors pooled over all subjects and trials for a given block. All blocks were the same as those shown in Fig 2A. C: Circular standard deviation of reach direction errors, computed by fitting a mixture model to the data in Fig 2B (see “Analysis of point-to-point task” section of Methods for more details). Each point corresponds to data from a single block and error bars indicate SEM across participants. Baseline standard deviations for each group are shown as horizontal lines. Days are demarcated by gray vertical lines.

86 They alternated this point-to-point task with a tracking task in a block-wise manner (Fig 1).

87 Fig 2A shows representative raw cursor trajectories at baseline, early learning, and at late learning for  
88 each group in the point-to-point task. As previously found [27], participants initially experienced great  
89 difficulty in coordinating their two hands together to move the cursor straight towards each target. But  
90 they gradually improved their performance with practice, eventually moving between targets in a straight  
91 line, similar to their performance when using an easy mapping in which the cursor appeared exactly halfway  
92 between the left and right hand (“baseline”; Fig 1).

93 We assessed each groups’ skill level by quantifying how precisely they aimed the cursor’s initial movement  
94 towards the target (Fig 2B-C; see Supplementary Fig 1 for other kinematic metrics throughout learning).  
95 Precision improved with practice, reaching a plateau after roughly 5 days that was close to baseline levels.  
96 Although there were small improvements in performance from day 5 to day 10 in the 10-day group, these  
97 improvements were not statistically significant (linear mixed effects model with post-hoc Tukey test [see  
98 Methods for details about statistical analyses]:  $t = -0.79$ ,  $p = 0.9665$ ). Thus, participants became more  
99 skilled in performing point-to-point reaches under the bimanual mapping, and the bulk of this improvement  
100 occurred over the first five days of practice.

## 101 **Performance in the tracking task also improved with practice over multiple days**

102 Participants also performed a second task under the bimanual mapping where they tracked a target moving  
103 in a sum-of-sines trajectory (frequencies ranging from 0.1–1.85 Hz; Fig 3A). Unlike the point-to-point task  
104 where participants had an unlimited amount of time to plan their movements at the start of each trial, in  
105 the tracking task, the target moved quickly and pseudorandomly, limiting the amount of time participants  
106 had to plan their movements; any movements planned at one moment would become outdated within tens  
107 of milliseconds as the target would move to a new, unpredictable location. Additionally, the amount of time  
108 participants had to prepare their movements depended on the frequency at which the target moved. At low  
109 frequencies, the target oscillated slowly, providing people ample time to prepare their movements. But at  
110 high frequencies, the target oscillated quickly, forcing people to respond quickly (similar in effect to other  
111 approaches to limiting preparation time, such as forcing responses at particular time intervals [32]).

112 With practice, participants learned to reduce the positional error between the target and cursor (Fig 3B).  
113 We examined participants' tracking performance at different frequencies of movement using a system identi-  
114 fication approach [33–37], which allowed us to separately examine the behavioral responses to target move-  
115 ments at different frequencies even though they occurred concurrently in the task. Specifically, we computed  
116 the gain and direction of cursor movement relative to target movement at each frequency, which can be  
117 interpreted analogously to the reach direction analysis for the point-to-point task in Fig 2B (see Methods  
118 for more details). Each arrow in Fig 3C shows the gain and direction of cursor movements in response to  
119 target movement at a particular frequency. Ideally, participants would track the target by moving their  
120 cursor in the same direction as the target. Thus, cursor responses to positive  $x$ -axis target movement (green)  
121 should be pointed rightwards while responses to positive  $y$ -axis target movement (purple) should be pointed  
122 upwards, which indeed was the case at baseline. By late learning, all groups exhibited movement gains and  
123 directions that approached that of baseline performance.

124 To statistically compare each group's performance, we computed the gain of horizontal cursor movements  
125 at the frequencies of  $x$ -axis target movement ( $x$ -component of green arrows in Fig 3C). Gains improved from  
126 day 1 to day 2 in the 2-day group (Fig 3D; linear mixed effects model with post-hoc Tukey test;  $p < 0.05$   
127 for 4 out of 6 frequencies) and from day 2 to day 5 in the 5-day group ( $p < 0.05$  for 3 out of 6 frequencies).  
128 However, gains did not significantly improve past day 5 in the 10-day group ( $p > 0.05$  for all frequencies).  
129 These data demonstrate that, with practice, participants became able to successfully move their hands in  
130 the appropriate direction to track the target and, as in the point-to-point task, the bulk of this improvement  
131 occurred in the first 5 days.

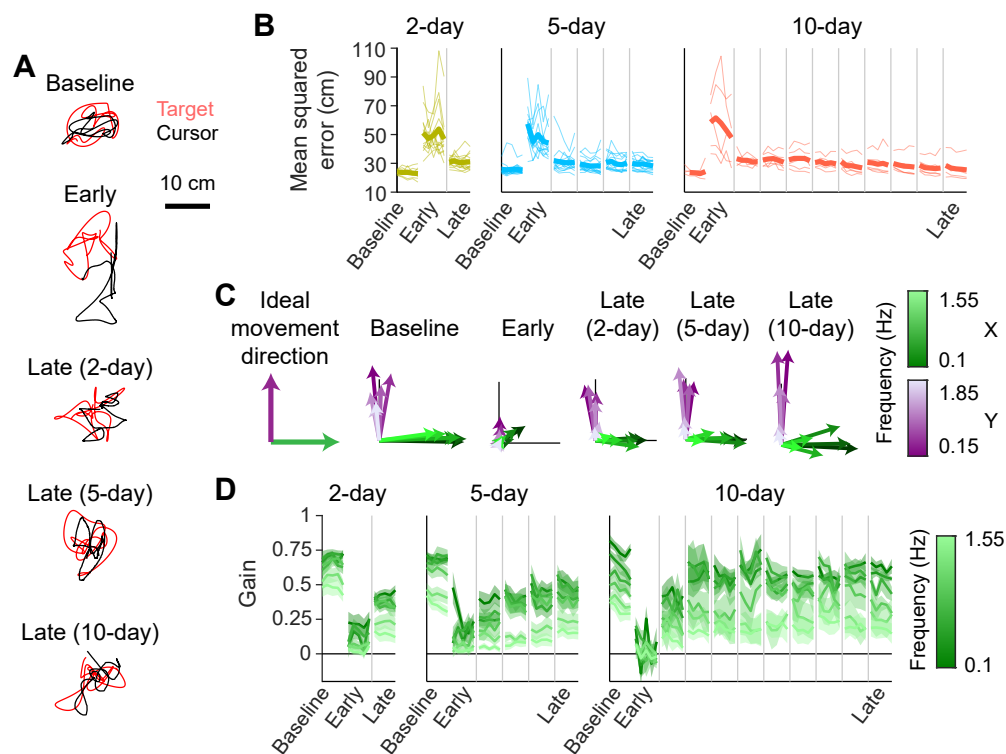

**Fig 3. Performance in the tracking task under the bimanual mapping.** A: Example cursor (black) and target (red) trajectories from single trials. B: Mean-squared error between cursor and target positions. Thin lines indicate individual participants while thick lines indicate group averages. Data collected from different days are separated by gray lines. Data from only one or two blocks are shown for each day for ease of visualization. C: Visualization of the cursor's movement direction and gain (relative to the target) at frequencies of  $x$ - (green) and  $y$ -axis (purple) target movement. Each arrow depicts the direction and gain averaged across participants at a single frequency. Lower and higher frequencies are depicted as darker and lighter colors, respectively. Black lines are scale bars indicating a movement gain of 0.5. Visualization of ideal movement direction is shown on the left. D: Gain of horizontal cursor movements at frequencies of  $x$ -axis target movement (horizontal component of green arrows in Fig 3B). Error bars indicate SEM across participants.

## 132 **Participants’ behavior in the point-to-point task was habitual after only two days** 133 **of practice**

134 Having examined participants’ skill, we next asked whether and when their behavior became habitual. Might  
135 participants’ behavior become habitual around the same time their skill plateaued (i.e. by Day 5), early in  
136 learning (i.e. by Day 2), or only after significant repetition of the stably performed skill (i.e. by Day 10)?  
137 Or, lastly, might participants behavior never have become habitual? To determine this, at the end of each  
138 groups’ final day of practice, we had participants control the cursor under a new flipped mapping where the  
139 mapping between the left hand and the cursor movement was reversed relative to what they had originally  
140 practiced (“flip” block), effectively amounting to a left-right mirror reversal applied on top of the originally  
141 practiced bimanual mapping. Participants were explicitly informed about the reversal of their left hand’s  
142 mapping, and we tested whether participants would habitually continue to control the cursor under the  
143 originally learned bimanual mapping or successfully alter their behavior according to the flipped mapping.

144 First, we assessed whether participants exhibited habitual behavior in the point-to-point task. On a given  
145 trial, if participants could successfully control the cursor under the flipped mapping, then we would expect  
146 their cursor’s initial movement to be aimed towards the true target (i.e., goal-directed). But if participants  
147 habitually controlled the cursor according to the original bimanual mapping, then we would expect their  
148 cursor’s initial movement to be aimed towards a virtual target reflected directly across a vertical mirroring  
149 axis. We found that participants in all three groups exhibited both goal-directed and habitual behavior  
150 during the flip block (Fig 4A) on different trials. We visualized how often participants’ movements were  
151 aimed towards the virtual mirrored target as a heat map plotting the cursor’s initial movement directions  
152 as a function of the target’s direction (Fig 4B). If participants reached towards the virtual mirrored target,  
153 their initial cursor directions would lie along the  $y = -x$  line. Although none of the groups exhibited initial  
154 cursor directions along this line at late learning, all groups did exhibit such behavior during the flip block.

155 We estimated the proportion of trials where participants initially reached towards the mirrored target by  
156 fitting a mixture model to the reach direction data (see “Analysis of point-to-point task” section in Methods  
157 for more details; see Supplementary Fig 2 for a model comparison and model recovery analysis), using this as  
158 a metric for how strongly participants exhibited habitual behavior. We found that the proportion of habitual  
159 movements was significantly higher in the flip block compared to late learning for all three groups (Fig 4C;  
160 linear mixed effects model with post-hoc Tukey test; 2-day:  $t = -5.89$ ,  $p < 0.0001$ ; 5-day:  $t = -9.18$ ,  
161  $p < 0.0001$ ; 10-day:  $t = -4.61$ ,  $p = 0.0010$ ). These data demonstrate that all groups exhibited habitual  
162 behavior in the point-to-point task.

163 Perhaps surprisingly, the proportion of reaches towards the mirrored target was not significantly different



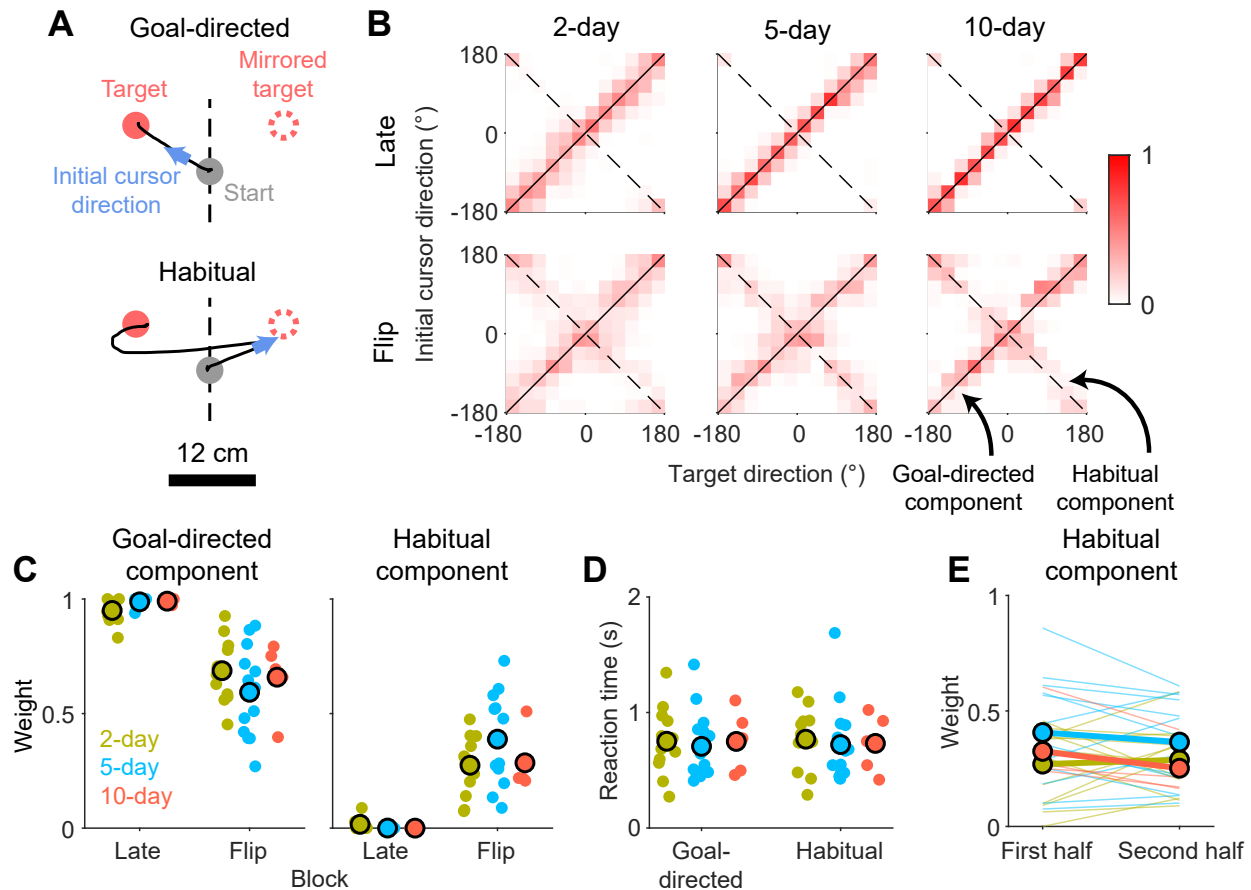

**Fig 4. Analysis of habit in the point-to-point task.** A: Cursor trajectories (black line) from single trials in the flip block. The trajectories show trials where the cursor's movement was initially aimed straight towards the target (upper) or aimed towards a virtual target (lower) mirrored across the vertical axis (dashed line). B: Heat map of cursor's initial movement direction as a function of target directions. Data were pooled from all subjects and grouped into bins of  $30^\circ$  on both axes. We defined  $0^\circ$  as the positive  $y$ -axis (i.e., the mirroring axis). Within each target direction bin, we computed the fraction of trials which fell in a particular reach direction bin, plotting this fraction as color intensity in the heat map. To measure the proportion of trials where participants exhibited habitual behavior, we fit a mixture model composed of two weighted von Mises distribution centered on either the  $y = x$  (goal-directed) or  $y = -x$  line (habitual behavior). C: Fitted weights for the goal-directed (left) and habitual (right) components of the mixture model depicted in Fig 4B. Fits for individual participants shown as small circles and group means shown as large circles. D: Reaction time for reaches towards the actual target (goal-directed) versus a virtual mirrored target (habitual). E: Weight of the habitual component of the mixture model when fit to data from either the first or second half of the flip block. Thin lines are individual participants and thick lines are group means.

164 between groups (Fig 4C; linear mixed effects model with post-hoc Tukey test; 2-day vs. 5-day:  $t = 2.08$ ,  
165  $p = 0.3098$ ; 2-day vs. 10-day:  $t = -0.46$ ,  $p = 0.9973$ ; 5-day vs. 10-day:  $t = 1.08$ ,  $p = 0.8887$ ). In other words,  
166 despite the fact that the 10-day group practiced using the original bimanual mapping for five times as long as  
167 the 2-day group, they did not exhibit more strongly habitual behavior in the point-to-point task. Moreover,  
168 the reaction times for goal-directed reaches were not significantly different from habitual reaches (Fig 4D;  
169 linear mixed effects model; no main effect of group [ $F(2, 29) = 0.09$ ,  $p = 0.9168$ ], reach [ $F(1, 29) = 0.03$ ,  
170  $p = 0.8705$ ], or interaction [ $F(2, 29) = 0.09$ ,  $p = 0.9167$ ]), suggesting that the lack of differences across  
171 groups in Fig 4C could not be explained by differences in the amount of time participants had to plan their  
172 movements.

173 In the flip block, we noted that participants occasionally adopted a strategy of initially moving the cursor  
174 vertically (the axis along which the mapping had not changed) before initiating the horizontal component  
175 of their movement. Therefore, as an alternative assay for habitual behavior, we computed the proportion of  
176 trials where the horizontal component of the cursor's movement was initially directed away from the target.  
177 This analysis yielded qualitatively similar results, with behavior in all three groups being habitual, and no  
178 significant differences in the strength of habits across groups (Supplementary Fig 3; linear mixed effects model  
179 with post-hoc Tukey test; 2-day vs. 5-day:  $t = -0.79$ ,  $p = 0.9685$ ; 2-day vs. 10-day:  $t = 0.30$ ,  $p = 0.9996$ ;  
180 5-day vs. 10-day:  $t = -0.28$ ,  $p = 0.9998$ ). Collectively, these results suggest that in the point-to-point task,  
181 participants exhibited equally strong habitual behavior regardless of whether they had practiced using the  
182 bimanual mapping for two, five, or ten days of practice.

### 183 **Behavior in the tracking task also became habitual after only two days of practice**

184 We next examined participants' behavior in the tracking task to see whether they would exhibit similar  
185 habitual behavior under the flipped mapping, or whether habit effects might even be exacerbated given  
186 the imperative to generate movements rapidly while tracking the target. We compared the direction of  
187 participants' responses (i.e. cursor movement) to movements of the target between late learning and the flip  
188 block (Fig 5A). During the flip block, if participants habitually behaved according to the original bimanual  
189 mapping, then their hand movement in response to horizontal target movement would be similar to late  
190 learning, and the horizontal movement of the cursor would therefore be directed opposite to the movement  
191 of the target. We expected that the extent of this effect might vary according to the frequency of target  
192 motion, with high frequencies being more likely to appear habitual owing to the need to respond more rapidly.  
193 We normalized the cursor's horizontal movement gain from the flip block by the gain from late learning such  
194 that normalized gains of -1 would indicate habitual behavior (Supplementary Fig 4). (In subsequent analyses,

195 we removed data from one outlier participant in the 10-day group—bottom left participant in Supplementary  
196 Fig 4—who exhibited erratic behavior in the flip block, with negative gains that were greater in amplitude  
197 than at late learning.) In the first flip block, all groups on average exhibited negative gains at two or more  
198 frequencies (Fig 5B; one-sample t-test with Holm-Bonferroni correction at  $\alpha = 0.05$ ; 2-day: 2 of 6 frequencies;  
199 5-day: 3 of 6 frequencies; 10-day: 2 of 6 frequencies), particularly at higher frequencies, as we expected.  
200 However, we did not find any evidence that groups with more practice exhibited significantly more negative  
201 gains than groups with less practice (linear mixed effects model with post-hoc Tukey test:  $p > 0.05$  for all  
202 comparisons of gains within frequencies).

203 The above analyses considers differences in behavior across groups. However, in previous work, we have  
204 found that habitual behavior can vary greatly across individuals [32]. We therefore also examined whether  
205 or not behavior was habitual at an individual-participant level. We calculated the proportion of participants  
206 in each group who exhibited significantly negative gains during the flip block. In all three groups, we found  
207 a mixture of habitual and non-habitual participants (Supplementary Fig 4; one-sample t-test with Holm-  
208 Bonferroni correction at  $\alpha = 0.05$ ; 2-day: 5 of 13 participants; 5-day: 7 of 14 participants; 10-day: 3 of  
209 4 participants). Although the proportion of participants who were habitual did appear to increase with  
210 practice, it is difficult to conclude whether or not this trend was meaningful, particularly given the small  
211 sample size of the 10-day group.

## 212 **The strength of habitual behavior was correlated between the point-to-point and** 213 **tracking tasks**

214 Might there be any relationship between the habitual behavior we observed in the point-to-point and tracking  
215 tasks? To examine this, we compared how strongly participants exhibited habitual behavior between the two  
216 tasks. First, we averaged the gains of each participant's tracking behavior at the highest three frequencies,  
217 given that we expected habitual behavior to be strongest at these frequencies [37]. We then correlated  
218 each subject's average gain with the proportion of habitual reaches they made in the point-to-point task,  
219 as in Fig 4C. Indeed, we found a correlation between tasks (Fig 5C, slope =  $-0.34$ , Pearson's  $r = 0.49$ ,  
220  $p = 0.0052$ ), suggesting that the tasks may have indeed assessed the same underlying habit.

## 221 **All groups' habits were similarly resistant to extinction**

222 An alternative way in which behavior may become habitual is by becoming more persistent, i.e., resistant  
223 to extinction. In other words, as one's skill increases, the habits one forms may persist for longer. To assess  
224 whether habitual behavior would become more persistent with more training, we examined participants'

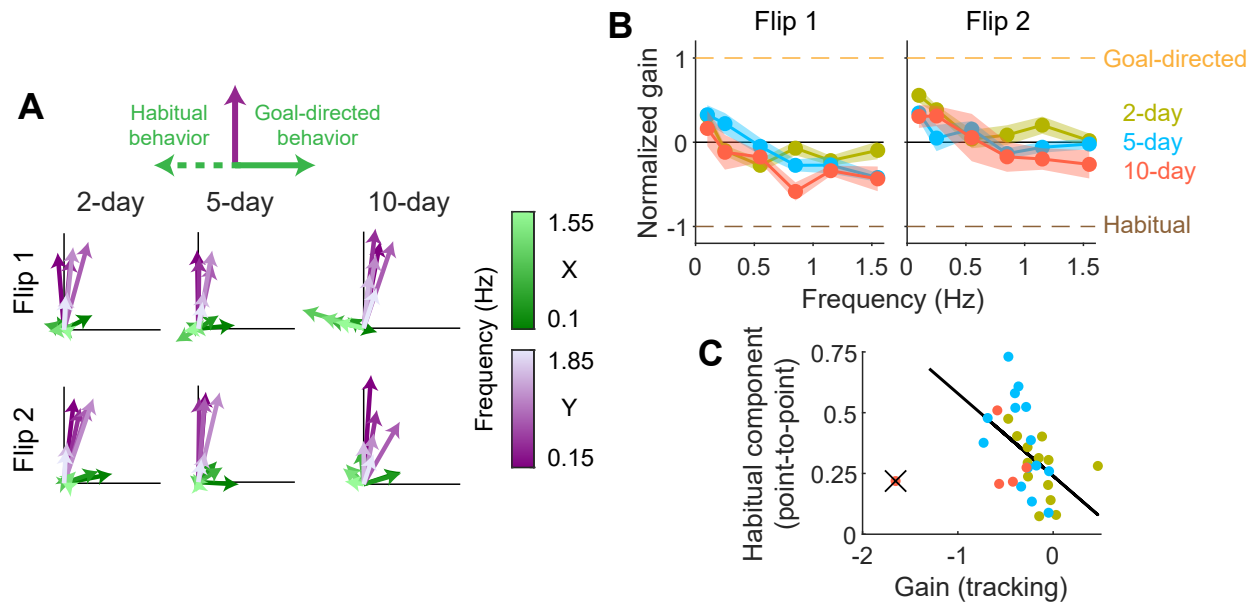

**Fig 5. Analysis of habit in the tracking task.** A: Visualization of the cursor's movement direction and gain (relative to the target) while using the flipped mapping, similar to Fig 3B. Each arrow depicts the average across participants at  $x$ - (green) and  $y$ -axis (purple) frequencies. Lower and higher frequencies are depicted as darker and lighter colors, respectively. Black lines are scale bars indicating a movement gain of 0.5. Flip 1 and Flip 2 are the first and second tracking blocks under the flipped mapping, respectively. At the top, we depict the direction the green arrows should point if participants exhibit goal-directed (right) or habitual (left) behavior. B: Gain of horizontal cursor movements under the flipped mapping normalized to the gain under the original bimanual mapping at late learning. If participants responded to target movement by moving their cursor in the same direction under both the original and flipped bimanual mappings, then the gain would be positive, approaching 1 if the movement gains were the same (goal-directed; yellow dashed line). But if they moved their cursor in opposite directions under the two mappings, then the gain would be negative, approaching -1 (habitual; brown dashed line). Error bars indicate SEM across participants. C: Linear regression between average gains of the highest 3 frequencies from the first flipped tracking block and the proportion of habitual reaches from the flipped point-to-point block in Fig 4C. Data from one outlier subject in the 10-day group (crossed out in black) was not used for fitting.

225 performance in a second tracking block under the flipped mapping, after having practiced the flipped mapping  
226 in a point-to-point block Fig 1). At the group level, participants no longer exhibited significantly negative  
227 gains at any frequency (Fig 5B; one-sample t-test with Holm-Bonferroni correction at  $\alpha = 0.05$ ), suggesting  
228 that the habits had been largely extinguished in all groups. However, at the level of individual participants,  
229 all 3 of participants in the 10-day group who exhibited negative gains in the first tracking block still did  
230 so in the second tracking block. Meanwhile, only 1 of 5 of participants in the 2-day group and 2 of 7 of  
231 participants in the 5-day group still exhibited significantly negative gains. While these data suggest that  
232 habitual behavior may have been more persistent in the 10-day group, again, they must be interpreted with  
233 caution given the small sample size of this group.

234 We attempted a similar analysis of the persistence of participants' habits by fitting the mixture model  
235 from Fig 4D to the first and last 50 reaches in the block instead of all 100 reaches. However, we found no  
236 evidence for any difference in the strength of habitual behavior between the first and last half of the block  
237 for all groups (Fig 4E; linear mixed effects model with post-hoc Tukey test; 2-day:  $t = -0.49$ ,  $p = 0.9963$ ;  
238 5-day:  $t = 1.11$ ,  $p = 0.8747$ ; 10-day:  $t = 1.17$ ,  $p = 0.8493$ ), suggesting that this aspect of habitual behavior  
239 did not become extinguished over this period.

## 240 Discussion

241 In the present study, we examined the time course over which habitual behavior emerged as participants  
242 learned a new continuous motor skill—controlling a cursor under a novel bimanual hand-to-cursor mapping.  
243 Participants became more skilled in using this mapping by practicing with a combination of point-to-point  
244 reaches and continuous tracking, and their skill level plateaued after around five days of practice. After either  
245 two, five, or ten days, we flipped the left hand's control of the cursor and tested whether participants would  
246 habitually continue to control the cursor according to the original mapping they had learned. We found that  
247 habitual behavior emerged after only two days of practice, which we observed in both the point-to-point and  
248 tracking tasks. We did not find compelling evidence, however, that habitual behavior became stronger with  
249 more practice.

250 While we mainly focused on assessing how *strong* habitual behavior became during learning, to a limited  
251 extent, we also assessed how *persistent* habits became, examining whether habits were extinguished through  
252 exposure to the flipped mapping. While this short period of practice seemed to be sufficient to extinguish  
253 the habit in the tracking task, we did not observe extinction in the point-to-point task. It is unclear why we  
254 observed a difference between the two tasks; although we expected the strength of habitual behavior to be  
255 affected by the amount of preparation time participants were afforded in each task, we did not expect habit

256 persistence to be affected. However, we emphasize that we did not find strong evidence to suggest that the  
257 persistence of habitual behavior depended on how long participants practiced the bimanual mapping.

258 It is important to note that when we analyzed individual participants' behavior, we found that a greater  
259 proportion of participants exhibited habitual behavior with more practice. Therefore, taking a conservative  
260 interpretation, one could say that our results are inconclusive as to whether behavior became more habitual  
261 with more practice. However, the inferences we could draw from the individual participant analysis were  
262 limited because they critically relied on data from our most practiced group which had a small sample size  
263 ( $n = 5$ ), and if one were to only use data from the other two larger groups, there is little evidence to suggest  
264 more participants in the 5-day group ( $n = 14$ ) exhibited habitual behavior than the 2-day group ( $n = 13$ ).  
265 Furthermore, our main result that the emergence of skill and habit dissociated during learning would not be  
266 impacted by the findings of the individual participant analysis.

267 One additional aspect of our experiment that we did not discuss (since it was not directly relevant to our  
268 primary question of when control became habitual) was that at the end of each day, participants performed an  
269 additional tracking block without visual feedback of the cursor's position. We used this block to examine the  
270 extent to which participants' learning could be attributed to improvements in feedforward control. However,  
271 we found that for all groups, there was negligible improvement in mean-squared tracking error throughout  
272 learning and movement gains remained low (Supplementary Fig 5), indicating that participants were not  
273 capable of expressing their learned behavior without visual feedback of the cursor.

274 Collectively, our results suggest a dissociation between the emergence of skill and habit during motor  
275 learning: behavior can become habitual early in learning before one's skill level has asymptoted, and likewise,  
276 behaviors which have already become habitual can still become more skillful through practice. Our findings  
277 parallel that of [32] who demonstrated that participants learning an arbitrary visuomotor association task  
278 exhibited improved speed-accuracy tradeoffs (i.e., improved skill) over twenty days of practice, even after  
279 behavior had become habitual after four days of practice. They further found that the habits could be ex-  
280 plained as an all-or-none phenomenon (i.e., one either is or is not habitual), consistent with our observation  
281 that habitual behavior did not become stronger with more practice. The skill in [32] is quite rudimentary in  
282 that performance improvements amount only to speeding up action selection by tens of milliseconds, which  
283 might potentially have occurred via a specialized mechanism. In the present study, however, the improve-  
284 ments in skill after becoming habitual were more significant and unlikely to be explained by improvements  
285 in the processing speed alone. The similarity of the results between the two studies suggest a potential  
286 commonality in the process by which habits form when learning new skill in both discrete and continuous  
287 domains.

288 Many studies of habits have suggested that habits may not be an all-or-nothing phenomenon, but that

289 some habits could be stronger or weaker than others. It remains unclear, however, exactly what it means for a  
290 behavior to become more strongly habitual. Habit strength could correspond to the strength of its immediate  
291 influence on behavior, e.g. how likely a habit is to be expressed, or it could correspond to how much the  
292 habitual behavior persists, or to some other related feature of behavior (e.g. stereotypy of movement. What  
293 metrics should we use to quantify these characteristics of habits? In our study, we quantified habit strength  
294 differently between the point-to-point (probability of expressing a habitual reach) and tracking tasks (gain  
295 of habitual movement), though we found that these measures were correlated. While this might suggest  
296 that these two assays measured a single underlying in different ways, we did also observe a dissociation  
297 in the persistence of behavior measured by these two different assays. Characterizing the ‘strength’ of a  
298 habit is further complicated by the fact that multiple component processes/computations may be involved  
299 in generating movement, and any one of these processes may become habitual. For instance, one’s ability  
300 to select what action to do (e.g., move the cursor to the right) may become habitual independently of  
301 one’s ability to execute that action (e.g., stereotyped kinematics of rightward movement; see [21] for a more  
302 in-depth discussion of this idea).

303 The present study provides new and important empirical evidence regarding how habits form and their  
304 relationship to skill. Our findings also have important implications for theoretical accounts of habits. A wide  
305 variety of theories have been proposed to explain the cognitive basis of habits, such as forming stimulus–  
306 response associations [12–15], caching expected future rewards [38–40], and caching computations/policies  
307 [19,41]. Central to these theories is the idea that habitual behavior is inflexible to change. Though behavioral  
308 inflexibility is (rightly) central to the definition of habits, our findings suggest that one may not need to break  
309 a habit in order to alter habitual behavior. To account for this, theoretical accounts of habits should allow  
310 scope for habitual behaviors to remain flexible to some degree. Learning rules which might accomplish this  
311 are incorporated into reinforcement learning-based frameworks, in which habitual behavior is often identified  
312 with model-free reinforcement learning which can still learn from experience, albeit slowly [38–40]. Our  
313 results underscore that habitual behavior is not set in stone, but can continue to evolve with experience—in  
314 this case, over multiple days of practice, unlike in model-free reinforcement learning where it can be observed  
315 in single trials [42].

316 How could a behavior be altered yet simultaneously remain habitual? If it is true that individual behaviors  
317 are generated via multiple intermediate computations that can independently become habitual, then it is  
318 possible for one computation to become fixed (i.e., habitual) while a different computation continues to  
319 improve with practice (i.e., more skillful). For instance, participants in our experiment may have habitually  
320 chosen to use a controller for the bimanual mapping, but their movement execution having chosen this  
321 controller could still become quicker and more precise. Alternatively, it is possible that computations which

322 have become habitual simply maintain some small level of flexibility within which the behavior can be altered,  
323 but this learning may be slow and limited in scope. Understanding how exactly flexibility arises in habitual  
324 behavior should be a focus of future work.

325 To conclude, a behavior becoming habitual is often viewed as the final step in learning: learned behavior  
326 must be repeated in order to render it habitual, at which point it becomes a persistent and dependable  
327 component of skilled performance. While this idea may seem intuitively true, it has not previously been  
328 empirically tested. Our results challenge this view, suggesting that behaviors become habitual early in  
329 learning but maintain some flexibility to change with experience. What do our results ultimately suggest  
330 about the role that habits play when we learn new motor skills? During learning, one may encounter  
331 situations where they must alter their behavior to improve task performance, and often these behaviors will  
332 have already become habitual through practice. Overcoming habits will likely be frustrating when one must  
333 substantially alter their behavior [43]. But if only slight alterations are needed, then one may be able to fine  
334 tune their habit without having to break it.

## 335 **Methods**

### 336 **Participants**

337 A total of 32 right-handed participants were recruited for this study ( $23.0 \pm 4.3$  [mean  $\pm$  standard deviation];  
338 13 male, 19 female), 13 for the 2-day group, 14 for the 5-day group, and 5 for the 10-day group (recruitment  
339 for the 10-day group was cut short due to the COVID-19 pandemic). All participants reported no prior  
340 history of neurological disorders. All methods were approved by the Johns Hopkins School of Medicine  
341 Institutional Review Board and were carried out in accordance with relevant guidelines and regulations.  
342 Informed consent was obtained from all participants in the study.

### 343 **Experimental setup**

344 Participants were seated in front of a table with both of their hands supported on the table by frictionless air  
345 sleds. The position of participants' hands were monitored at 130 Hz using a Flock of Birds magnetic tracker  
346 (Ascension Technology, VT, USA) placed near each hands' index finger. Participants viewed stimuli on a  
347 horizontal mirror which reflected an LCD monitor (60 Hz), and the mirror obscured vision of both hands.



## 348 Tasks

349 Participants learned to maneuver an on-screen cursor (circle of radius 2.5 mm) using one of two versions of a  
350 bimanual hand-to-cursor mapping. Half of the participants learned one version where up-down movements  
351 of the left hand produced right-left movements of the cursor while right-left movements of the right hand  
352 produced up-down movements of the cursor. The other half of participants learned a different version  
353 where the mapping from hand to cursor movements were 180° rotated relative to the previous version. We  
354 counterbalanced these two versions of the mapping to ameliorate any effects biomechanics may have had on  
355 our results.

356 Three different groups practiced the bimanual mapping over either two, five, or ten days of training.  
357 Training consisted of participants making point-to-point reaches towards randomly placed targets (circles  
358 of radius of 10 mm) within a 20 × 20 cm workspace. Participants were instructed to reach towards each  
359 target as quickly and accurately as possible, with each trial consisting of one target location. Once the  
360 cursor was stationary (speed < 0.065m/s) within the target for 1 second, the target appeared in a random  
361 direction 12 cm away. To encourage participants to move quickly, we provided feedback to the participants  
362 indicating whether their peak velocity exceeded 0.39 m/s on that trial. If this threshold was exceeded, the  
363 target turned yellow and a pleasant tone was played once the cursor reached the target, and if the threshold  
364 was not exceeded, then the target did not turn yellow and no tone was played. The baseline point-to-point  
365 block consisted of 30 trials while all other point-to-point blocks consisted of 100 trials.

In between blocks of point-to-point reaching, participants performed a manual tracking task. In this task,  
a target moved continuously on the screen in a sum-of-sinusoids trajectory. The trajectory was composed of  
twelve sinusoids, six each in the  $x$ - and  $y$ -axes, parameterized by amplitude,  $\vec{a}$ , frequency,  $\vec{\omega}$ , and phase,  $\vec{\phi}$ ,  
vectors. The target's position along a single axis,  $r$ , was computed as:

$$r = \sum_{i=1}^6 a_i \cos(2\pi t \omega_i + \phi_i). \quad (1)$$

366 For the  $x$ -axis,  $\vec{a} = [2.31, 2.31, 2.31, 1.76, 1.30, 0.97]$  (cm) and  $\vec{\omega} = [0.1, 0.25, 0.55, 0.85, 1.15, 1.55]$  (Hz). For  
367 the  $y$ -axis,  $\vec{a} = [2.31, 2.31, 2.31, 1.58, 1.03, 0.81]$  (cm) and  $\vec{\omega} = [0.15, 0.35, 0.65, 0.95, 1.45, 1.85]$  (Hz). The  
368 values of  $\vec{\phi}$  were randomized between  $[-\pi, \pi)$ . Each trial lasted 66 seconds, and during the first 5 seconds  
369 of each trial, the target's amplitude ramped up linearly from 0 to its full value. Each block consisted of 5  
370 trials. Periodically, participants performed a tracking block without visual feedback of their cursor.

371 To assess the extent to which participants control of the bimanual mapping had become habitual, at the  
372 end of each groups' final day of training, we flipped the left hand's mapping to cursor movement (flip block):

373 up-down movements of the left hand now resulted in left-right movements of the cursor instead of right-left  
374 (in the case of the 180° rotated bimanual mapping, right-left movements of the cursor became left-right).  
375 We required three different groups of participants for this experiment because we assessed habitual behavior  
376 at different time points during learning, and after a participant has used the flipped mapping once, any  
377 future learning of the original bimanual mapping would be contaminated. The order of all blocks during the  
378 experiment is depicted in Fig 1.

## 379 **Data analysis**

### 380 **Software**

381 Data analyses were performed in MATLAB R2018b (The Mathworks, Natick, MA, USA) and R version  
382 4.0.2 (RStudio, Inc., Boston, MA, USA; [44]) using the Matrix [45], lme4 [46], lmerTest [47], and emmeans  
383 packages [48]. Figures were generated using Adobe Illustrator (Adobe Inc., San Jose, CA, USA).

### 384 **Analysis of point-to-point task**

385 The cursor's position in each trial was smoothed using a third-order Savitzky-Golay filter. Path length was  
386 defined as the total distance that the cursor traveled in a single trial. Movement time was defined as the time  
387 between movement initiation (when the cursor left the start target) and termination (when the cursor was  
388 in the end target with speed  $< 0.065\text{m/s}$ ). Reaction time was defined as the time between when the target  
389 appeared and the cursor's tangential velocity exceeded  $0.1\text{ m/s}$ . Reaction time was not computed for a small  
390 minority of trials (1260 out of 41560) where the velocity did not exceed  $0.1\text{ m/s}$ . Peak velocity was defined  
391 as the cursor's highest tangential velocity. We computed the tangential velocity by linearly resampling the  
392 cursor's position at the times recorded by the Flock of Birds and computing the distance traversed by the  
393 cursor between two consecutive samples divided by the time elapsed. Resampling was necessary because,  
394 occasionally, the recorded time at which a sample was collected by the Flock of Birds did not match the true  
395 time at which it was collected, causing the calculated velocity to be inaccurate. Velocity profiles were also  
396 smoothed using a third-order Savitzky-Golay filter.

Initial reach direction was defined as the direction of the instantaneous velocity vector 150 ms after movement initiation. Initial reach direction error was computed as the difference in angle between this instantaneous velocity vector and the vector pointing from the target on the previous trial to the target on the current trial. Probability density functions were estimated for reach direction errors using a kernel smoothing function, implemented as the `ksdensity` function in MATLAB. We measured the variability in participants' initial reach direction errors (i.e., how consistently straight participants reached towards the

target) by fitting a mixture model to this data. In the model, we assumed that participants' reach direction errors,  $x$ , were generated by one of two causes: 1) an error from a goal-directed reach towards the target (modeled as a von Mises distribution) or 2) an error from a reach in a random direction (modeled as a uniform distribution). The probability density function of the mixture model,  $\text{mix}(\cdot)$ , was defined as

$$\text{mix}(x \mid \mu, \kappa, \alpha) = \alpha \cdot \text{vm}(x \mid \mu, \kappa) + (1 - \alpha) \cdot \text{unif}(x) \quad (2)$$

where  $\alpha$  is a parameter valued between 0 and 1 weighting the probability density functions of the von Mises,  $\text{vm}(\cdot)$ , and uniform distributions,  $\text{unif}(\cdot)$ . The probability density functions of the individual distributions were defined as

$$\text{vm}(x \mid \mu, \kappa) = \frac{e^{\kappa \cos(x-\mu)}}{2\pi I_0(\kappa)}, \quad \text{unif}(x) = \frac{1}{2\pi}. \quad (3)$$

397 Here,  $\mu$  and  $\kappa$  are the mean and concentration of the von Mises distribution and  $I_0(\cdot)$  is the modified Bessel  
398 function of the first kind with order 0.

The parameters  $\mu$ ,  $\kappa$ , and  $\alpha$  were fit to the data from single participants in each block via maximum likelihood estimation. Specifically, we used the MATLAB function `fmincon` to determine the values of the parameters that would maximize the below likelihood function over the  $n$  trials within one block:

$$\hat{\mu}, \hat{\kappa}, \hat{\alpha} = \underset{\mu, \kappa, \alpha}{\text{argmax}} \left\{ \sum_{i=1}^n \log [\text{mix}(x_i \mid \mu, \kappa, \alpha)] \right\}. \quad (4)$$

Then, using the fitted concentration parameter of the von Mises distribution,  $\hat{\kappa}$ , we computed the circular standard deviation,  $\sigma$ , as

$$\sigma = \sqrt{-2 \ln(R)}, \quad R = I_1(\hat{\kappa})/I_0(\hat{\kappa}). \quad (5)$$

399 We used  $\sigma$  as our measure of the variability of participants' reach direction errors.

400 To assess the whether participants exhibited habitual behavior during the flip block, we quantified each  
401 participant's tendency to reach towards the true target versus a virtual target flipped across the mirroring  
402 axis. More specifically, we assumed that for each trial, participants' initial reach direction could be explained  
403 by at least one of three causes: 1) a goal-directed reach towards the target, 2) a habitual reach towards the  
404 mirrored target, and 3) a reach aimed towards neither target (i.e., random movement). We modeled the first  
405 two causes as von Mises distributions with different means— $\phi_a$  and  $\phi_m$ , set by the direction of the actual  
406 and mirrored targets, respectively—but the same concentration parameter,  $\kappa$ . For each participant, we fixed  
407 the concentration parameter to be equal to the  $\hat{\kappa}$ 's estimated for late learning in Eq 4. We modeled the third  
408 component, random movements, as a uniform distribution.

Assuming that each participant's behavior within one block could be modeled as a weighted mixture of these three distributions,  $\text{mix}'(\cdot)$ , we used the MATLAB function `fmincon` to determine the weights,  $\alpha_a$  and  $\alpha_m$ , that would maximize the following likelihood function over the  $n$  trials within one block:

$$\hat{\alpha}_a, \hat{\alpha}_m = \underset{\alpha_a, \alpha_m}{\operatorname{argmax}} \left\{ \sum_{i=1}^n \log [\text{mix}'(x | \phi_a, \phi_m, \kappa)] \right\} \quad (6)$$

where

$$\text{mix}'(x | \phi_a, \phi_m, \kappa) = \alpha_a \cdot \text{vm}(x | \phi_a, \kappa) + \alpha_m \cdot \text{vm}(x | \phi_m, \kappa) + (1 - \alpha_a - \alpha_m) \cdot \text{unif}(x). \quad (7)$$

409 Here,  $x$  represents participants' reach directions while  $\alpha_a$  and  $\alpha_m$  correspond to the probabilities that a  
 410 participant reached towards the actual, and mirrored targets, respectively. Definitions for  $\text{vm}(\cdot)$  and  $\text{unif}(\cdot)$   
 411 can be found in Eq 3. We used  $\hat{\alpha}_m$  as our metric for the strength of habitual behavior. For Fig 4E, instead  
 412 of fitting this model to all trials in the flip block, we fit the model to either the first or second half of trials  
 413 in this block.

414 We used the fitted weights from this approach to classify each trial as either goal-directed, habitual,  
 415 or random. For each trial, we computed the probability that the reach direction was generated from each  
 416 of the three mixture components under the fitted mixture model's probability density function (in essence,  
 417 computing  $p(\text{reach direction} | \text{goal-directed})$ ,  $p(\text{reach direction} | \text{habitual})$ , and  $p(\text{reach direction} | \text{random})$ .  
 418 Trials were classified as goal-directed, habitual, or random based on which of these three probabilities was  
 419 the highest. We excluded trials where the direction of the target was within  $30^\circ$  of the mirroring axis (the  
 420  $y$ -axis) as the von Mises distributions for the goal-directed versus habitual reaches would have similar means  
 421 and, therefore, would be too difficult to distinguish from each other (1153 out of 3200 data points excluded).  
 422 We used this classification to compute the reaction times of goal-directed versus habitual reaches in Fig 4D.

Additionally, we compared the model in Eq 7 with an alternative model which was designed to capture behavior where participants would move their right hand (controls vertical cursor movement) in the correct direction but their left hand (controls horizontal cursor movement) would generate random movements. We modeled participants reach directions,  $x$ , given the target's direction,  $\phi_a$ , as a mixture of two weighted uniform distributions:

$$\text{mix}^*(x | \phi_a) = \begin{cases} \alpha \cdot \text{unif}^*(x), & (\sin(x) \geq 0 \ \& \ \sin(\phi_a) \geq 0) \mid (\sin(x) < 0 \ \& \ \sin(\phi_a) < 0) \\ (1 - \alpha) \cdot \text{unif}^*(x), & (\sin(x) < 0 \ \& \ \sin(\phi_a) \geq 0) \mid (\sin(x) \geq 0 \ \& \ \sin(\phi_a) < 0) \end{cases} \quad (8)$$

where

$$\text{unif}^*(x) = \frac{1}{\pi}. \quad (9)$$

423 Here,  $\alpha$  is the probability that the cursor moved vertically in the correct direction. The fits for the models  
424 in Eq 7 and Eq 8 were compared using BIC. Model recovery analyses were performed by simulating data  
425 from both of these models, fitting both models to each simulated dataset, comparing fits using BIC, and  
426 generating a confusion matrix. To generate data from Eq 7, we used values for  $\alpha_a$  and  $\alpha_m$  that ranged  
427 between 0 and 1, and we fixed  $\kappa = 3$ . Lower  $\kappa$ 's set higher variability for the von Mises distributions (i.e.,  
428 harder to distinguish from the model in Eq 8), so we fixed  $\kappa$  to be the lowest average  $\kappa$  that we observed  
429 in the late learning data from any group, as estimated in Eq 4. Model recovery across different choices of  
430 parameters were compared by computing the accuracy of the confusion matrices.

431 As an alternative approach to assessing whether participants exhibited habitual behavior while using the  
432 flipped mapping, we assessed whether their horizontal cursor movements were aimed away from the target.  
433 Using only the cursor's  $x$ -axis position, for each trial, we determined whether the cursor's instantaneous  
434 velocity vector was aimed towards the right or left 150 ms after the cursor deviated 1 cm from the center of  
435 the starting target (i.e., the radius of the target). We classified cursor movements in each trial as moving  
436 away from the target if the velocity vector's direction was opposite of the direction of the target relative to  
437 the starting position (e.g., target located to the left but cursor moving towards the right). This method was  
438 unable to compute an initial horizontal reach direction on a small minority of trials (95 out of 3200 trials)  
439 where the target on the current trial was either directly above or below the target from the previous trial.  
440 This was because either: 1) the cursor did not deviate 1 cm horizontally away from the center of the starting  
441 target (i.e., the radius of the target), making it impossible to detect the time of movement initiation, or  
442 2) the detected movement initiation time was less than 150 ms prior to the end of the trial, meaning that  
443 the trial ended before the time at which we assessed reach direction. These trials were excluded from the  
444 analysis.

#### 445 **Analysis of tracking task**

446 Data from two tracking trials (each from different subjects) were excluded from the analysis because our  
447 experiment hardware failed to accurately record the positions of stimuli with known positions. Tracking  
448 error was computed as the mean-squared error between the cursor's and target's positions. Time-domain  
449 trajectories of the cursor's and target's position (the first 60 seconds of each trial following the initial 5 second  
450 ramp period) were converted to phasors (complex numbers representing sinusoids) in the frequency domain  
451 via the discrete Fourier transform. An input-output transfer function was computed at every frequency by  
452 dividing the cursor's phasor by the target's phasor. This transfer function described the relationship between  
453 the cursor and target sinusoids in terms of gain (relative amplitude) and phase (difference in time).

454 Using these transfer functions, we sought to describe the direction that participants moved their cursor

455 to track the target. In this task, participants' cursor movements would conventionally be described as phase  
456 lagged relative to the target with a positive gain (i.e., moving in the same direction as the target with a time  
457 delay). However, when a mirror reversal has been applied (such as in the flipped mapping), participants'  
458 may habitually continue to use their original control policy, causing their movements to be flipped across  
459 the mirroring axis relative to before. Although the relationship between movements before and after the flip  
460 could be described as movements with positive gain but now in antiphase (i.e., moving in the same direction  
461 as the target but with more time delay), a better way to describe them would be to say that the movements  
462 have the same phase but a negative gain (i.e., moving with the same time delay but in the opposite direction  
463 of the target).

Given that conventional analysis methods always yield a positive gain to describe frequency-domain data,  
we used the method described in [37] to compute a signed gain,  $g$ , relating cursor and target movements.  
This was computed as the dot product between transfer functions:

$$g = a \cdot \hat{b} \quad (10)$$

464 where  $a$  is the transfer function for a given block of interest and  $\hat{b}$  is the transfer function at baseline with  
465 unit length. Computing the dot product implicitly fixes the phase of cursor movements to be the same as  
466 baseline across all blocks, allowing a signed gain to be computed. This assumption of fixed phase is valid  
467 for analyzing data in late learning as participants' phase lags under the bimanual mapping became more  
468 similar to baseline through practice. We computed this signed gain between each axis of target and cursor  
469 movement ( $x$ -axis target movement and  $x$ -axis cursor movement,  $x$ -axis target movement and  $y$ -axis cursor  
470 movement, etc.), building a series  $2 \times 2$  matrices relating the transformation between the two trajectories  
471 where each matrix represented the transformation within a small bandwidth of frequencies. The green  
472 (purple) arrows in the Fig 3C and 5A were generated by plotting the first (second) column of each matrix.  
473 Fig 3D and Supplementary Fig 5B was generated by plotting the element in the first row and first column  
474 of each matrix.

475 To quantify the strength of habitual behavior in Fig 5B, we reanalyzed the gain between  $x$ -axis target  
476 and  $x$ -axis cursor movements from the flip blocks by fixing their phases to be the same as late learning. We  
477 did this because any habitual behavior would manifest as lingering usage of the originally learned bimanual  
478 mapping, and the habit should be measured with respect to behavior under this mapping. When analyzing  
479 these normalized gains at the group level, we excluded one outlier participant in the 10-day group who  
480 exhibited dramatically more negative gains than other participants within the group (lower left participant  
481 in Supplementary Fig 4). To compare the habitual behavior we observed between the point-to-point and

482 tracking tasks, we correlated each participant's  $\alpha_m$  from Eq 6 with their normalized gains (averaged over  
483 the highest three frequencies) from Fig 5B via linear regression.

#### 484 **Statistics**

485 Most primary statistical analysis were performed by fitting linear mixed effects models to the data. For  
486 all analyses in Fig 2, the models used group (2-, 5-, or 10-day) and block (2-day: day 1 vs. day 2; 5-day:  
487 day 2 vs. day 5; 10-day: day 5 vs. day 10) as fixed effects and subject as a random effect. For Fig 4C  
488 and E, models used the same group and subject effects but with a different set of blocks being compared  
489 ([late learning vs. flip block] and [first half of flip block vs. second half of flip block], respectively). For  
490 Fig 4D, models used the same group and subject effects but with reach type as an additional fixed effect  
491 (goal-directed vs. habitual). Post-hoc pairwise comparisons were performed using the Tukey test.

492 For data from the tracking task, mixed effects models were fit using the same effects as Fig 2 but with  
493 an additional fixed effect of frequency. We also fit separate models to data from each frequency because  
494 behavior varied dramatically as a function of frequency. Post-hoc pairwise comparisons were performed  
495 using the Tukey test. An additional Bonferroni correction factor of 6 was applied to the p-values for pairwise  
496 comparisons to account for the separate models fits for each frequency. Additionally, to determine whether  
497 participants exhibited significantly negative gains in the tracking task, for each frequency, we performed a  
498 series of one-sample t-tests and corrected for multiple (6) comparisons using a Holm-Bonferroni correction  
499 with  $\alpha = 0.05$ .

500 **Data and Code Availability** The data and code used in the study can be found in the Johns Hopkins  
501 University Data Archive: <https://doi.org/10.7281/T1/FWDYPW>.

502 **Acknowledgements** We thank Yue Du, John Krakauer, Amy Bastian, and Christopher Fetsch for helpful  
503 discussions. This material is based upon work supported by the National Science Foundation under Grant  
504 No. 1825489 (N.J.C.). This work was also supported by Facebook Technologies (A.M.H. and C.S.Y.). C.S.Y.  
505 was supported by the Link Foundation Modeling, Simulation & Training Fellowship.

506 **Author Contributions** C.S.Y and A.M.H. conceptualized the experiment. N.J.C provided technical  
507 expertise for the tracking methodology. C.S.Y collected data and performed data analysis while A.M.H. and  
508 N.J.C. supervised. C.S.Y. and wrote the manuscript while all authors reviewed and edited the manuscript.

509 **Competing Interests** The authors declare no competing interests.

## 510 References

- 511 [1] Sandlin, D. The backwards brain bicycle - smarter every day 133 (2015). URL <https://www.youtube.com/watch?v=MFzDaBzB1L0&t=2s>.
- 512
- 513 [2] Wood, W. & Neal, D. T. A new look at habits and the habit-goal interface. *Psychol. Rev.* **114**, 843–863  
514 (2007).
- 515 [3] Seger, C. & Spiering, B. A critical review of habit learning and the basal ganglia. *Front. Syst. Neurosci.*  
516 **5** (2011).
- 517 [4] Hélie, S. & Cousineau, D. *The cognitive neuroscience of automaticity: Behavioral and brain signatures*,  
518 141–159 (Nova Science Publishers, 2014).
- 519 [5] Adams, C. D. & Dickinson, A. Instrumental responding following reinforcer devaluation. *Q. J. Exp.*  
520 *Psychol. Sect. B* **33**, 109–121 (1981).
- 521 [6] Balleine, B. W. & O’Doherty, J. P. Human and rodent homologies in action control: Corticostriatal  
522 determinants of goal-directed and habitual action. *Neuropsychopharmacology* **35**, 48–69 (2010).
- 523 [7] de Wit, S. *et al.* Shifting the balance between goals and habits: Five failures in experimental habit  
524 induction. *J. Exp. Psychol.* **147**, 1043–1065 (2018).
- 525 [8] Luque, D., Molinero, S., Watson, P., López, J., Francisco & Le Pelley, M. E. Measuring habit formation  
526 through goal-directed response switching. *J. Exp. Psychol. Gen.* **149**, 1449–1459 (2020).
- 527 [9] Ceceli, A. O., Myers, C. E. & Tricomi, E. Demonstrating and disrupting well-learned habits. *PLoS One*  
528 **15**, 1–28 (2020).
- 529 [10] Popp, N. J., Yokoi, A., Gribble, P. L. & Diedrichsen, J. The effect of instruction on motor skill learning.  
530 *J. Neurophysiol.* **124**, 1449–1457 (2020).
- 531 [11] Tricomi, E., Balleine, B. W. & O’Doherty, J. P. A specific role for posterior dorsolateral striatum in  
532 human habit learning. *Eur. J. Neurosci.* **29**, 2225–2232 (2009).
- 533 [12] McDonald, R. J., King, A. L. & Hong, N. S. Context-specific interference on reversal learning of a  
534 stimulus-response habit. *Behav. Brain Res.* **121**, 149–165 (2001).
- 535 [13] Faure, A., Haberland, U., Condé, F. & Massiou, N. E. Lesion to the nigrostriatal dopamine system  
536 disrupts stimulus-response habit formation. *J. Neurosci.* **25**, 2771–2780 (2005).



- 537 [14] Yin, H. H. & Knowlton, B. J. The role of the basal ganglia in habit formation. *Nat. Rev. Neurosci.* **7**,  
538 464–476 (2006).
- 539 [15] Robbins, T. W. & Costa, R. M. Habits. *Curr. Biol.* **27**, R1200–R1206 (2017).
- 540 [16] Salmon, D. P. & Butters, N. Neurobiology of skill and habit learning. *Curr. Opin. Neurobiol.* **5**, 184–190  
541 (1995).
- 542 [17] Bernacer, J. & Murillo, J. I. The aristotelian conception of habit and its contribution to human  
543 neuroscience. *Front. Hum. Neurosci.* **8** (2014).
- 544 [18] Graybiel, A. M. & Grafton, S. T. The striatum: Where skills and habits meet. *Cold Spring Harb.*  
545 *Perspect. Biol.* **7**, a021691 (2015).
- 546 [19] Haith, A. M. & Krakauer, J. W. The multiple effects of practice: skill, habit and reduced cognitive  
547 load. *Curr. Opin. Behav. Sci.* **20**, 196–201 (2018).
- 548 [20] Marien, H., Custers, R. & Aarts, H. *Understanding the Formation of Human Habits: An Analysis*  
549 *of Mechanisms of Habitual Behaviour*, 51–69 (Springer International Publishing, Cham, 2018). URL  
550 [https://doi.org/10.1007/978-3-319-97529-0\\_4](https://doi.org/10.1007/978-3-319-97529-0_4).
- 551 [21] Du, Y., Krakauer, J. W. & Haith, A. M. The relationship between skills and habits in humans. *PsyArXiv*  
552 (2021).
- 553 [22] Gritsenko, V. & Kalaska, J. F. Rapid online correction is selectively suppressed during movement with  
554 a visuomotor transformation. *J. Neurophysiol.* **104**, 3084–3104 (2010).
- 555 [23] Telgen, S., Parvin, D. & Diedrichsen, J. Mirror reversal and visual rotation are learned and consolidated  
556 via separate mechanisms: Recalibrating or learning de novo? *J. Neurosci.* **34**, 13768–13779 (2014).
- 557 [24] Collins, D., Morriss, C. & Trower, J. Getting it back: A case study of skill recovery in an elite athlete.  
558 *Sport Psychol.* **13**, 288–298 (1999).
- 559 [25] Hanin, Y., Malvela, M. & Hanina, M. Rapid correction of start technique in an olympic-level swimmer:  
560 A case study using old way/new way. *J. Swim. Res.* **16**, 11–17 (2004).
- 561 [26] Carson, H. J., Collins, D. & Jones, B. A case study of technical change and rehabilitation: Intervention  
562 design and multidisciplinary team interaction. *Int. J. Sport Psychol.* **45**, 57–78 (2014).
- 563 [27] Haith, A. M., Yang, C. S., Pakpoor, J. & Kita, K. *De novo* motor learning of a bimanual control task  
564 over multiple days of practice. *bioRxiv* (2021).

- 565 [28] Krakauer, J. W., Pine, Z. M., Ghilardi, M.-F. & Ghez, C. Learning of visuomotor transformations for  
566 vectorial planning of reaching trajectories. *J. Neurosci.* **20**, 8916–8924 (2000).
- 567 [29] Fernandez-Ruiz, J., Wong, W., Armstrong, I. T. & Flanagan, J. R. Relation between reaction time and  
568 reach errors during visuomotor adaptation. *Behav. Brain Res.* **219**, 8–14 (2011).
- 569 [30] Bond, K. M. & Taylor, J. A. Flexible explicit but rigid implicit learning in a visuomotor adaptation  
570 task. *J. Neurophysiol.* **113**, 3836–3849 (2015).
- 571 [31] Morehead, J. R., Qasim, S. E., Crossley, M. J. & Ivry, R. Savings upon re-aiming in visuomotor  
572 adaptation. *J. Neurosci.* **35**, 14386–14396 (2015).
- 573 [32] Hardwick, R. M., Forrence, A. D., Krakauer, J. W. & Haith, A. M. Time-dependent competition  
574 between goal-directed and habitual response preparation. *Nat. Hum. Behav.* **3**, 1252–1262 (2019).
- 575 [33] Roth, E., Zhuang, K., Stamper, S. A., Fortune, E. S. & Cowan, N. J. Stimulus predictability mediates  
576 a switch in locomotor smooth pursuit performance for *eigenmannia virescens*. *J. Exp. Biol.* **214**, 1170–  
577 1180 (2011).
- 578 [34] Madhav, M. S., Stamper, S. A., Fortune, E. S. & Cowan, N. J. Closed-loop stabilization of the Jamming  
579 Avoidance Response reveals its locally unstable and globally nonlinear dynamics. *J. Exp. Biol.* **216**,  
580 4272–4284 (2013).
- 581 [35] Sponberg, S., Dyrh, J. P., Hall, R. W. & Daniel, T. L. Luminance-dependent visual processing enables  
582 moth flight in low light. *Science* **348**, 1245–1248 (2015).
- 583 [36] Zimmet, A. M., Cao, D., Bastian, A. J. & Cowan, N. J. Cerebellar patients have intact feedback control  
584 that can be leveraged to improve reaching. *eLife* **9**, e53246 (2020).
- 585 [37] Yang, C. S., Cowan, N. J. & Haith, A. M. De novo learning versus adaptation of continuous control in  
586 a manual tracking task. *eLife* **10**, e62578 (2021).
- 587 [38] Daw, N. D., Niv, Y. & Dayan, P. Uncertainty-based competition between prefrontal and dorsolateral  
588 striatal systems for behavioral control. *Nat. Neurosci.* **8**, 1704–1711 (2005).
- 589 [39] Dolan, R. J. & Dayan, P. Goals and habits in the brain. *Neuron* **80**, 312–325 (2013).
- 590 [40] Hogarth, L. *A Critical Review of Habit Theory of Drug Dependence*, 325–341 (Springer International  
591 Publishing, Cham, 2018). URL [https://doi.org/10.1007/978-3-319-97529-0\\_18](https://doi.org/10.1007/978-3-319-97529-0_18).

- 592 [41] Maisto, D., Friston, K. & Pezzulo, G. Caching mechanisms for habit formation in active inference.  
593 *Neurocomputing* **359**, 298–314 (2019).
- 594 [42] Gläscher, J., Daw, N., Dayan, P. & O’Doherty, J. P. States versus rewards: Dissociable neural prediction  
595 error signals underlying model-based and model-free reinforcement learning. *Neuron* **66**, 585–595 (2010).
- 596 [43] Toner, J., Montero, B. G. & Moran, A. The perils of automaticity. *Rev. Gen. Psychol.* **19**, 431–442  
597 (2015).
- 598 [44] R Core Team. *R: A Language and Environment for Statistical Computing*. R Foundation for Statistical  
599 Computing, Vienna, Austria (2020). URL <https://www.R-project.org/>.
- 600 [45] Bates, D. & Maechler, M. *Matrix: Sparse and Dense Matrix Classes and Methods* (2019). URL  
601 <https://CRAN.R-project.org/package=Matrix>. R package version 1.2-18.
- 602 [46] Bates, D., Mächler, M., Bolker, B. & Walker, S. Fitting linear mixed-effects models using lme4. *J. Stat.*  
603 *Softw.* **67**, 1–48 (2015).
- 604 [47] Kuznetsova, A., Brockhoff, P. B. & Christensen, R. H. B. lmerTest package: Tests in linear mixed  
605 effects models. *J. Stat. Softw.* **82**, 1–26 (2017).
- 606 [48] Lenth, R. *emmeans: Estimated Marginal Means, aka Least-Squares Means* (2020). URL [https://](https://CRAN.R-project.org/package=emmeans)  
607 [CRAN.R-project.org/package=emmeans](https://CRAN.R-project.org/package=emmeans). R package version 1.4.8.

608 **Supplementary Material**

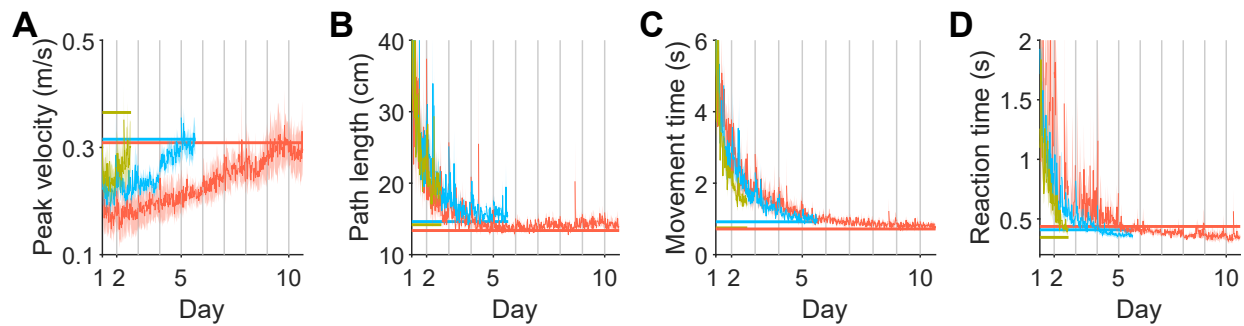

**Supplementary Fig 1. Kinematics of point-to-point movements.** Peak velocity, path length, movement time, and reaction time of point-to-point movements from baseline to late learning. Data were averaged across bins of 5 trials and error bars indicate SEM across participants. Baseline values for each group are shown as horizontal lines. Different days are demarcated by gray vertical lines.

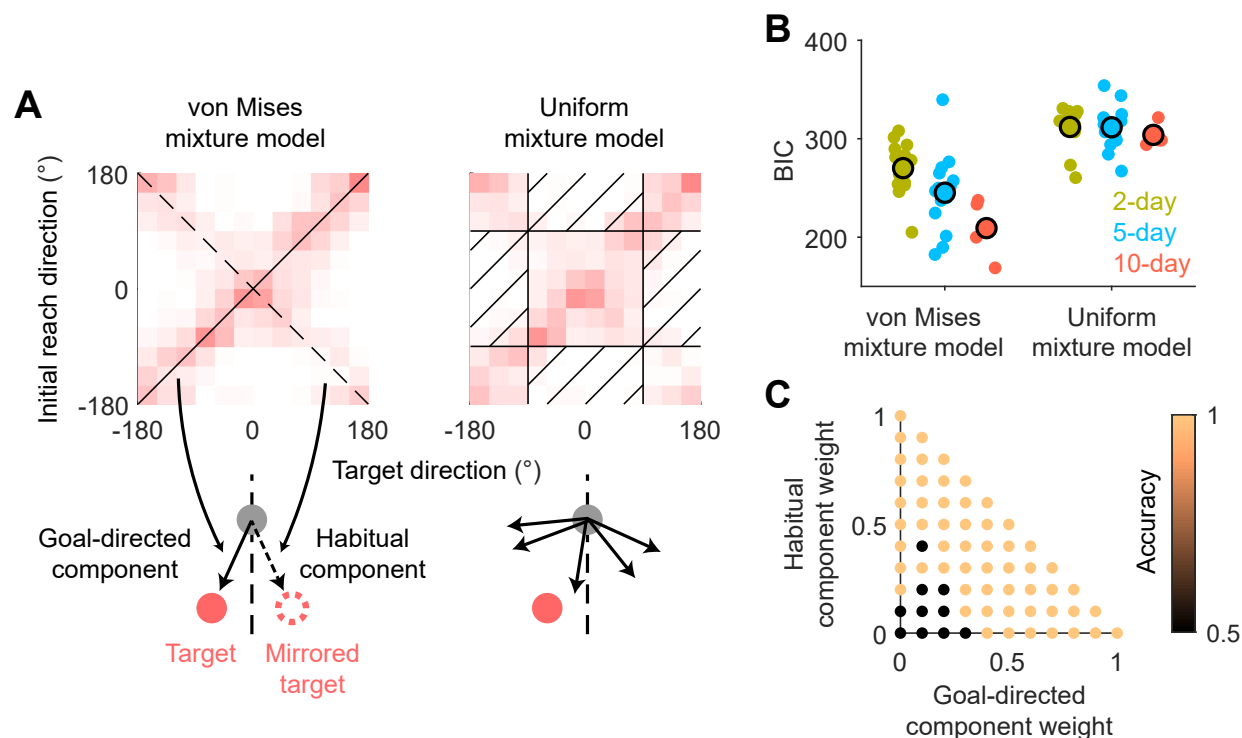

**Supplementary Fig 2. Model comparison and model recovery analysis.** A: Depictions of the two mixture models fit to participants' initial reach directions. (Left) Model composed of two von Mises distributions centered around the  $y = x$  (captures goal-directed reaches; solid line) and  $y = -x$  lines (captures habitual reaches; dashed line) as well as a uniform distribution (captures random reaches). This model would be appropriate if cursor movements were generally aimed either directly towards the target or towards a virtual target mirrored across the  $y$ -axis. (Right) Model composed of two weighted uniform distributions capturing cursor movements towards (non-hatched area) or away (hatched area) from the target in the  $y$ -axis. This model would be appropriate if participants generated correct right-hand movements (vertical movements of the cursor) but random left-hand movements (horizontal movements of the cursor). Heat maps of data from the 2-day group in the flip block are shown for reference.  $0^\circ$  is defined as the positive  $y$ -axis. B: Comparison of models fitted to data from the flip block. Lower BIC scores indicate better fits. C: Model recovery analysis. We simulated data from both the von Mises and uniform mixture models and then fit both models to this data, examining which model fit the data better using a confusion matrix. Accuracy of the confusion matrix is plotted for these combinations of weights. When data are generated from the von Mises mixture model with the weights of the two von Mises components summing to be over 0.5, the accuracy was 100%. Empirically, we found that the sum of these weights is generally well over 0.5 (Fig 4D), suggesting that the von Mises mixture model can be recovered with the type of behavior we observed.

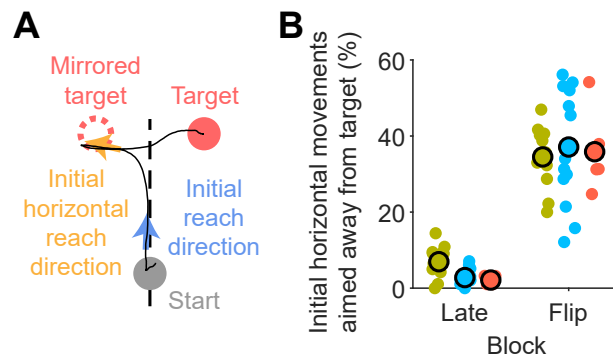

**Supplementary Fig 3. Reach direction analysis of horizontal cursor movements.** The analysis in Fig 4C quantified habitual behavior based on the cursor's *initial* reach direction, which may not have captured habitual behavior which occurred *later* in the trial. As a result, we performed an additional analysis quantifying the proportion of horizontal cursor movements initially aimed away from the target. A: Example cursor trajectory (black line) where habitual behavior occurred towards the end of a reach; although the cursor's movement was initially aimed along the mirroring axis (blue), the cursor was aimed away from the true target towards the end of the movement (orange). Mirroring axis shown as a dashed line. B: Percentage of trials where the cursor's initial horizontal movement was aimed away from the target.

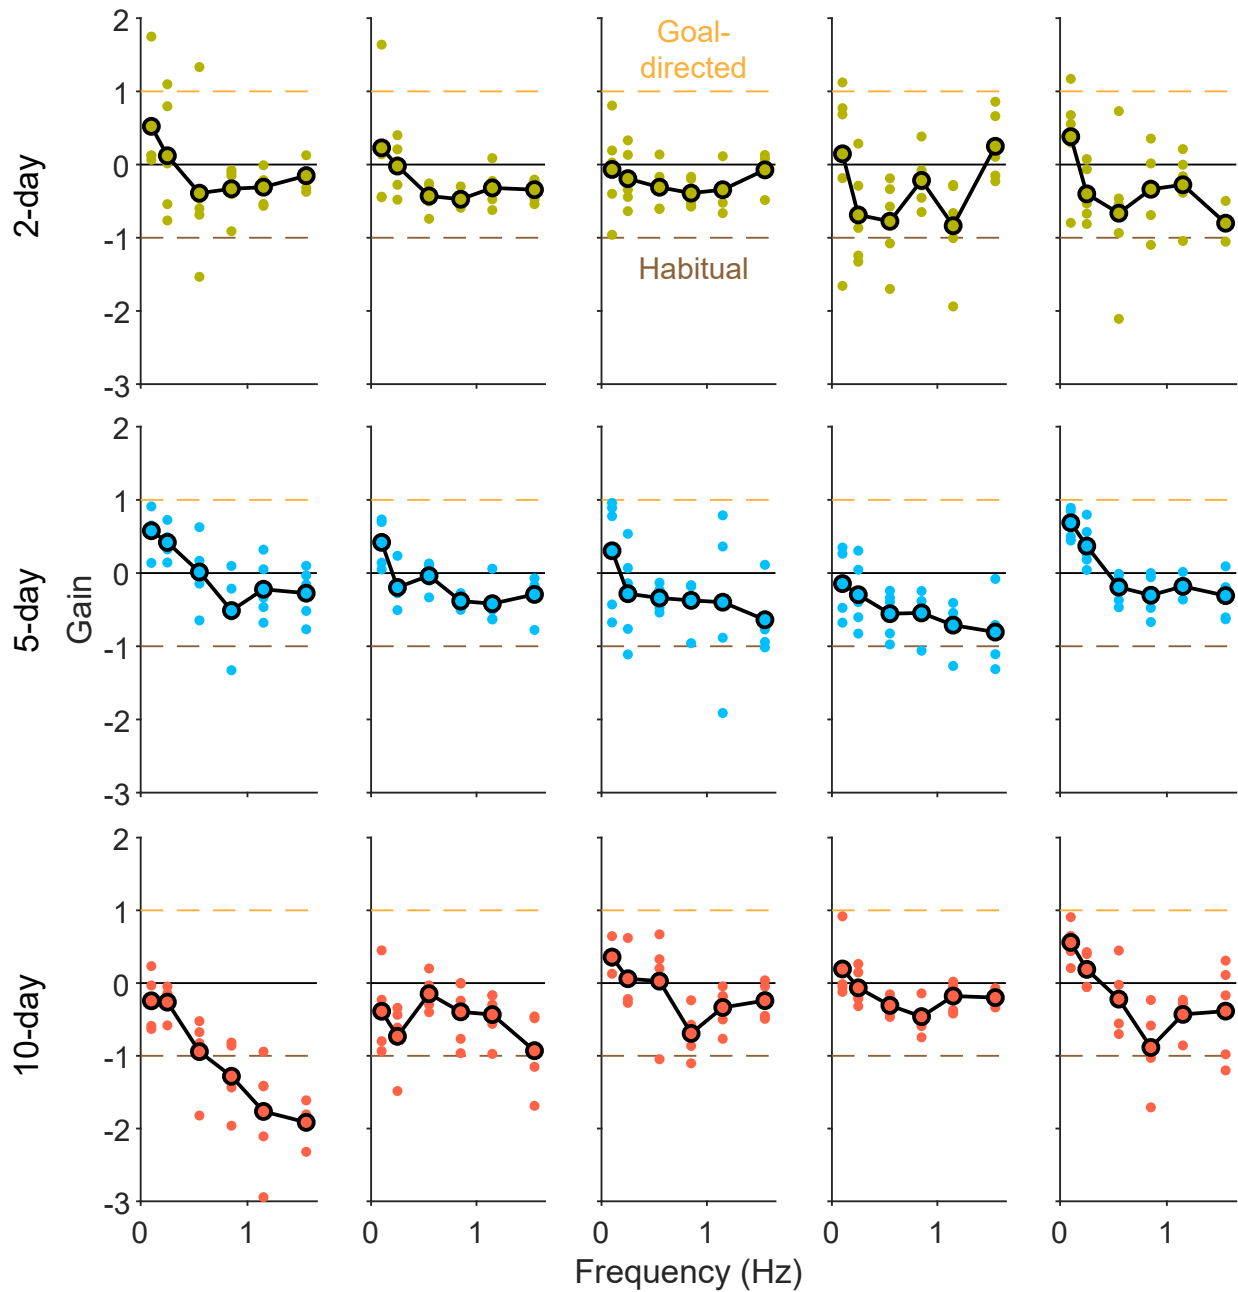

**Supplementary Fig 4. Gain of movements under the flipped mapping from single participants.** Data from five participants in each group during the first flipped tracking block are shown, with individual trial data shown as small dots and averages across trials shown as black lines. These data were used to generate Fig 5B.

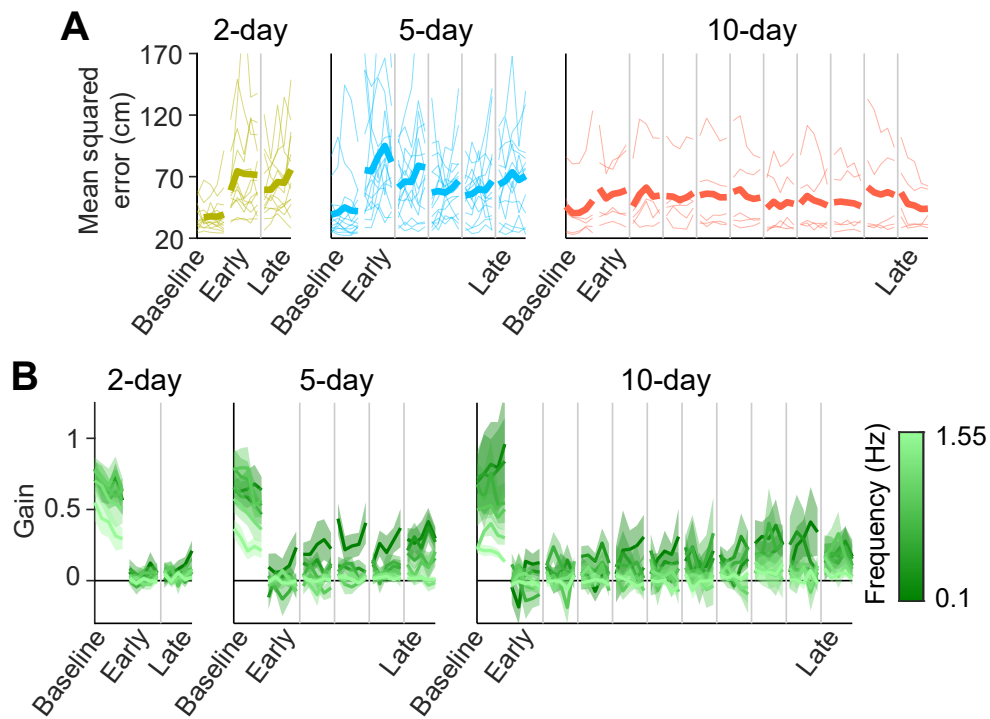

**Supplementary Fig 5. Analysis of tracking trials without visual feedback of the cursor.** A: Mean-squared error between cursor and target positions. Thin lines indicate individual participants while thick lines indicate group averages. Data collected from different days are separated by gray lines. B: Gain between target and cursor movements at frequencies of  $x$ -axis target movement. Lower and higher frequencies are depicted as darker and lighter colors, respectively. Error bars indicate SEM across participants.
